# Supplementary material for: Estimation of secondary organic aerosol viscosity from explicit modeling of gas-phase oxidation of isoprene and α -pinene
Source: Copernicus journal article supplement (doi:10.5194/acp-21-10199-2021), 2021-07-07
Supplement: Supplementary file 2 [file acp-21-10199-2021-supplement.zip]

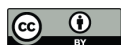

## *Supplement of*

# **Estimation of secondary organic aerosol viscosity from explicit modeling of gas-phase oxidation of isoprene and $\alpha$ -pinene**

**Tommaso Galeazzo et al.**

*Correspondence to:* Manabu Shiraiwa (m.shiraiwa@uci.edu)

- acp-21-10199-2021-supplement-title-page.pdf
- SI\_figures\_CSVfiles
  - Fig1\_viscosity\_isoprene\_simulated\_kappa.csv
  - Fig2\_viscosity\_apinene\_simulated.csv
  - Fig3\_apinene\_simulated\_massVSviscosity.csv
  - Fig4a\_isopreneSOA\_simulated\_composition.csv
  - Fig4b\_apineneSOA\_simulated\_composition.csv.csv
  - Fig5\_Simulated\_f2c\_percentage.csv
  - Fig6\_regressions\_data.csv
  - RH\_vs\_viscosity\_observations.csv
  - SI\_figures.pdf
- \_\_MACOSX
  - .\_SI\_figures\_CSVfiles
  - SI\_figures\_CSVfiles
    - \* .\_Fig1\_viscosity\_isoprene\_simulated\_kappa.csv
    - \* .\_Fig2\_viscosity\_apinene\_simulated.csv
    - \* .\_Fig3\_apinene\_simulated\_massVSviscosity.csv
    - \* .\_Fig4a\_isopreneSOA\_simulated\_composition.csv
    - \* .\_Fig4b\_apineneSOA\_simulated\_composition.csv.csv
    - \* .\_Fig5\_Simulated\_f2c\_percentage.csv
    - \* .\_Fig6\_regressions\_data.csv
    - \* .\_RH\_vs\_viscosity\_observations.csv
    - \* .\_SI\_figures.pdf

The copyright of individual parts of the supplement might differ from the article licence.
